# Supplementary material for: IL-25 and IL-33 Contribute to Development of Eosinophilic Airway Inflammation in Epicutaneously Antigen-Sensitized Mice
Source: PLoS One. 2015 Jul 31;10(7):e0134226. doi: 10.1371/journal.pone.0134226 (PMC4521793; doi:10.1371/journal.pone.0134226)
Supplement: S8 Table — (XLSX) [file pone.0134226.s008.xlsx]

## Sheet: S8 Table
Figure. 3E IL-33KO
Total																									TTEST
Strain	Treatment	#1	#2	#3	#4	#5	#6	#7	#8	#9	#10	#11	#12	#13	#14	#15	#16	#17	#18	#19	#20	Average	SD	SE	vs PBS	vs Wild-type
WT	PBS	38	54	82	68	56	76	48	68	54	138											68.2	27.8799	8.8164
	OVA	184	286	72	128	108	114	110	196	160	370	254	196	170	148	120	168	214	256	282	128	183.2	75.1319	16.8	1.90207e-06
IL-33-/-	PBS	110	28	102	70	88	132	78	110	58	66	78										83.6364	28.9802	8.73787		0.228838
	OVA	128	490	152	192	100	128	184	182	168	162	200	226	324	136	130	216	136	260	276	124	195.7	90.0486	20.1355	2.79479e-05	0.636414
Eosinophils
WT	PBS	0	2	2	4	2	2	4	2	10	8											3.6	3.09839	0.979796
	OVA	36	32	12	28	12	10	10	16	26	102	38	20	14	22	12	16	28	30	30	16	25.5	20.1141	4.49766	0.000109688
IL-33-/-	PBS	4	2	14	4	4	6	0	4	6	4	8										5.09091	3.61814	1.09091		0.322073
	OVA	4	48	26	12	4	6	8	8	6	6	12	22	16	8	8	20	6	24	14	10	13.4	10.5651	2.36243	0.00369259	0.024076
Neutropihls
WT	PBS	4	10	10	2	4	8	14	12	54	16											13.4	14.9681	4.73333
	OVA	38	70	22	20	34	26	62	32	36	80	60	34	38	40	30	34	58	50	30	66	43	17.1985	3.84571	8.95857e-05
IL-33-/-	PBS	20	2	20	6	10	34	6	18	12	8	8										13.0909	9.18101	2.76818		0.955809
	OVA	46	86	40	58	38	40	24	28	36	30	82	98	40	32	76	44	96	96	52	55	54.85	24.8475	5.55607	3.51251e-07	0.0885464
Macrophages
WT	PBS	34	40	66	60	48	64	48	38	70	48											51.6	12.6421	3.99778
	OVA	96	160	46	70	66	62	64	108	88	200	116	88	104	64	54	100	130	142	176	70	100.2	42.7374	9.55637	8.5649e-05
IL-33-/-	PBS	60	24	60	52	72	78	86	60	82	36	40										59.0909	19.887	5.99614		0.313066
	OVA	72	320	74	110	48	70	100	116	110	100	92	94	170	74	84	106	82	122	150	54	107.4	58.1363	12.9997	0.00235187	0.658171
Lymphocytes
WT	PBS	0	2	4	2	2	2	2	2	4	2											2.2	1.13529	0.359011
	OVA	14	24	8	8	10	8	10	10	14	32	20	28	18	24	14	22	22	26	26	4	17.1	8.11691	1.815	8.9633e-08
IL-33-/-	PBS	26	0	4	10	8	2	2	2	14	1	14										7.54545	7.96698	2.40213		0.0512583
	OVA	6	36	12	12	10	12	52	30	16	26	14	12	30	14	6	14	4	18	16	8	17.4	11.8606	2.65211	0.0102891	0.92618
