# Supplementary material for: IL-25 and IL-33 Contribute to Development of Eosinophilic Airway Inflammation in Epicutaneously Antigen-Sensitized Mice
Source: PLoS One. 2015 Jul 31;10(7):e0134226. doi: 10.1371/journal.pone.0134226 (PMC4521793; doi:10.1371/journal.pone.0134226)
Supplement: S10 Table — (XLSX) [file pone.0134226.s010.xlsx]

## Sheet: S10 Table
Figure. 4B IL-25KO
EPO activity																																TTEST
Strain	Treatment	#1	#2	#3	#4	#5	#6	#7	#8	#9	#10	#11	#12	#13	#14	#15	#16	#17	#18	#19	#20	#21	#22	#23	#24	#25	#26	#27	Average	SD	SE	vs PBS	vs Wild-type
WT	PBS	0.837	0.988	1.1	0.876	1.86	0.473	0.557	0.845																				0.942	0.424732	0.134312
	OVA	2.027	2.267	1.381	1.726	2.206	2.38	0.884	1.507	1.331	1.166	1.731	1.678	1.419	1.84	0.974	1.619	0.621	3.424	1.468	1.422	0.538	0.714	0.944	0.804	0.452	1.463		1.461	0.666339	0.148998	0.0175013
IL-25-/-	PBS	0.599	0.682	0.647	0.781	0.613	0.519	1.365	1.329	0.289																			0.758222	0.359949	0.108529		0.355403
	OVA	0.941	0.781	0.981	0.948	1.233	1.032	1.452	1.948	1.431	1.802	0.785	1.263	0.69	1.05	1.04	0.841	1.001	1.427	0.798	0.658	0.683	2.091	1.907	1.458	0.786	0.621	1.653	1.1593	0.433086	0.0968411	0.0141287	0.0581941
MPO activity
WT	PBS	3.477	4.509	4.231	0	0.369	6.176	3.205	0.435																				2.80025	2.27819	0.720428
	OVA	12.475	17.128	6.597	10.06	16.336	18.714	0	2.867	6.695	5.892	11.456	10.809	7.181	11.931	3.829	3.231	0.88	11.457	2.289	2.231	0.429	0.964	1.361	0.908	0.544	2.877		6.50542	5.72688	1.28057	0.0119034
IL-25-/-	PBS	2.482	2.992	2.482	1.932	0	2.436	1.447	0.429	3.526																			1.96956	1.15853	0.349311		0.374041
	OVA	3.596	2.482	3.713	3.115	5.267	3.829	6.498	13.082	8.213	12.321	2.992	6.988	2.349	3.945	3.829	2.741	1.619	7.538	2.848	0.964	0.824	0.824	5.86	4.641	3.201	1.161	1.263	4.2853	3.1728	0.70946	0.00295974	0.0903993
EPO mRNA expression
WT	PBS	18.5335	11.1595	3.61485	5.73117	14.1296																							10.6337	6.08694	1.92486
	OVA	78.5838	239.176	140.235	22.7145	10.9302	147.928	33.402	31.2672	137.598	55.5542	42.1235	59.9308																83.287	68.6248	15.345	0.0037129
IL-25-/-	PBS	19.5547	1.09901	4.43117	1.25797	6.64151																							6.59687	7.60473	2.29291		0.382451
	OVA	37.8098	9.95246	27.4812	23.0576	90.1243	33.6776	36.3696	21.6873	4.00431	17.1336	5.09915																	27.8543	23.804	5.32273	0.0187057	0.0199266
MPO mRNA expression
WT	PBS	0	0	0	0	0																							0	0	0
	OVA	0	0	0	0	0	0	0	0	0	0	0	0																0	0	0	#DIV/0!
IL-25-/-	PBS	0	0	0	0	0																							0	0	0		#DIV/0!
	OVA	0	0	0	0	0	0	0	0	0	0	0																	0	0	0	#DIV/0!	#DIV/0!
